**Cell-based screen identifies human type I interferon-stimulated regulators of  
*Toxoplasma gondii* Infection**

**Anton Gossner<sup>1</sup>, Anna Raper<sup>1</sup>, Musa A. Hassan<sup>1\*</sup>**

<sup>1</sup>Division of Infection and Immunity, The Roslin Institute, The University of  
Edinburgh, Edinburgh, United Kingdom

\*Correspondence: [musa.hassan@roslin.ed.ac.uk](mailto:musa.hassan@roslin.ed.ac.uk)

## Abstract

Macrophages activated with interferons (IFNs) respond with transcriptional changes that enhance clearance of intracellular pathogens such as *Toxoplasma*, a ubiquitous apicomplexan parasite that infects more than a billion people worldwide. Although IFNs generally inhibit *Toxoplasma*, the parasite can also induce components of the host IFN signalling pathway to enhance survival in host cells. Compared to the type II IFN gamma (IFN $\gamma$ ), the role of type I IFNs in macrophage response to *Toxoplasma* is relatively not well characterized. Here, using fluorescent *Toxoplasma* and a CRISPR/Cas9 knockout library that only targets interferon-stimulated genes (ISGs), we adapted a loss-of-function flow cytometry-based approach to systematically identify type I ISGs that control *Toxoplasma* growth in THP-1 cells, a human macrophage cell line. The system enabled the rapid screening of more than 1900 ISGs for type I (IFN $\alpha$ )-induced inhibitors and enhancers of *Toxoplasma* growth in THP-1 cells. We identified 26 genes that are associated with *Toxoplasma* growth arrest out of which we confirmed *MAX*, *SNX5*, *F2RL2*, and *SSB*, as potent IFN $\alpha$ -induced inhibitors of *Toxoplasma* in THP1 cells. These findings provide a genetic and experimental roadmap to elucidate type I IFN-induced cell-autonomous responses to *Toxoplasma*.

## 1 INTRODUCTION

2 *Toxoplasma gondii*, a zoonotic protozoa that infects over a billion people worldwide,  
3 is one of the most common foodborne parasites with the greatest global impact<sup>1</sup>.  
4 *Toxoplasma* is a major cause of coma and death in HIV/AIDS patients as well as  
5 childhood blindness and defects in foetal brain development. Although infection in  
6 healthy individuals is mostly asymptomatic, latent parasites can reactivate in  
7 immunocompromised individuals and cause severe diseases such as encephalitis,  
8 hepatitis, and myocarditis<sup>2</sup>. While not yet proven, *Toxoplasma* is also causally linked  
9 with several neurological and behavioural disorders including schizophrenia<sup>3</sup>.  
10 Current anti-*Toxoplasma* drugs are not well tolerated and are ineffective during  
11 chronic infections, making the development of novel *Toxoplasma* control strategies  
12 an important priority for biomedical research.

13

14 Interferons (IFNs), a large family of related cytokines that form an integral part of the  
15 innate immune system – the first line of defence against invading pathogens, are  
16 known to play an important role in *Toxoplasma* pathogenesis. Activation of host  
17 cells, including macrophages by these cytokines leads to the upregulation of many  
18 effector molecules that can kill or inhibit *Toxoplasma*. They can also shape the  
19 adaptive immune response to *Toxoplasma* by triggering release of cytokines and  
20 chemokines. Developing a better understanding of the IFN response, and how  
21 *Toxoplasma* counteract their effects can, therefore, have important implications for  
22 how we treat *Toxoplasma* infections. Currently, three main types of IFNs are known:  
23 type I, II, and III<sup>4</sup>. IFN gamma (IFN $\gamma$ ) – the only type II IFN – induces the transcription  
24 of hundreds of interferon-stimulated genes (ISGs) by activating Janus Kinase 1 and  
25 2 (JAK1/2) to phosphorylate homodimers of the signal transducer and activator of

26 transcription 1 (STAT1). Type I IFNs (IFN $\alpha$  and IFN $\beta$ ), induces the expression of  
27 ISGs with canonical IFN-sensitive response element (ISRE) by activating the  
28 phosphorylation of STAT1 and STAT2 heterodimers to interact with interferon  
29 regulatory factor 9 (IRF9)<sup>5</sup>. IFN $\gamma$  is a well-characterized mediator of cell-autonomous  
30 immunity against *Toxoplasma* and other intracellular pathogens in vertebrates<sup>6-8</sup>.  
31 IFN $\gamma$  can also inhibit or initiate the development of *Toxoplasma* cysts in the central  
32 nervous system and muscle tissues. For example, IFN $\gamma$  induces GTPases such as  
33 p47 immunity-related GTPases (IRGs) and guanylate binding proteins (GBPs) that  
34 destroy the parasitophorous vacuole membrane (PVM) leading to the death of the  
35 parasite within<sup>9</sup>, or nitric oxide (NO) that inhibit parasite replication and initiate the  
36 developmental switch from tachyzoites to bradyzoites<sup>10</sup>. Mice lacking IRGs, GBPs,  
37 or NO are highly susceptible to *Toxoplasma*<sup>11</sup>. Expectedly, *Toxoplasma* virulence  
38 factors target components of the IFN signalling pathway. Although important insights  
39 into host-*Toxoplasma* interactions have been gained from studies in mice, there are  
40 several differences between murine and human immune systems. For example,  
41 humans lack functional toll-like receptors (TLRs) 11 and 12<sup>12</sup>, and human  
42 macrophages do not produce NO in response to IFN $\gamma$  or *Toxoplasma*<sup>13</sup>, which are  
43 critical for the detection and inhibition of *Toxoplasma* in mice. Nevertheless, IFN $\gamma$   
44 plays a central role in human cell-autonomous responses against *Toxoplasma*. For  
45 example, IFN $\gamma$ -induced tryptophan degradation by indole-2,3-dioxygenase (*IDO*)  
46 expression is a well-characterized response mechanism against *Toxoplasma* in  
47 human fibroblasts<sup>14</sup>. In addition, macrophages from patients with defects in IFN $\gamma$ -  
48 receptor (*IFNR1*) activity have a reduced capacity to kill *Toxoplasma*<sup>15</sup>.

49

50 Unlike IFN $\gamma$ , the role of type I IFNs in human cell-autonomous responses to  
51 *Toxoplasma* is still emergent. Type I and type II IFNs activate some overlapping  
52 pathways, however, there are type I- and type II-specific ISGs, reflecting the  
53 activation of different signalling pathways. In particular, IFN $\gamma$  induces more genes  
54 related to apoptosis and cytokine interactions than IFN $\alpha$ . Additionally, type I IFNs  
55 can also inhibit some aspects of IFN $\gamma$ -induced protective responses<sup>16</sup>. Nevertheless,  
56 there is strong empirical evidence that type I IFNs play some role in controlling  
57 *Toxoplasma* in human and murine cells. Compared to wildtype controls, mice lacking  
58 functional type I IFN receptor (*Ifnar1*) exhibit increased susceptibility to  
59 *Toxoplasma*<sup>17</sup>. In addition IFN $\beta$  inhibits *Toxoplasma* in human macrophages<sup>18</sup>,  
60 retinal epithelial cells<sup>19</sup>, and mouse macrophages<sup>20</sup>. Although these findings suggest  
61 a role for type I IFNs in controlling *Toxoplasma*, a systematic analysis of type IFN-  
62 induced ISGs with anti-*Toxoplasma* properties in human cells is largely still lacking.

63

64 Since IFNs directly and indirectly induce the expression of several genes, the  
65 regulatory role of IFN in *Toxoplasma* infection is expected to depend on the  
66 expression of ISGs. Recently, genome-wide CRISPR/Cas9 knockout (GeCKO)<sup>21</sup> or  
67 ISG-overexpression<sup>22,23</sup> screens have been used to rapidly characterize murine or  
68 human ISGs. However, the ISG-expression library has limitations in scope and  
69 precision. The limitations in scope arise from the limited number of ISGs in the  
70 expression library (~600), which is less than the number of known ISGs in the  
71 human genome. Limitations in precision arise from the potential for positive feedback  
72 via IFN signalling triggered by overexpression of individual ISGs, which can  
73 complicate the ability to precisely identify ISGs that directly control *Toxoplasma*.  
74 Similarly, because of the potential effect of genes that function downstream of ISGs,

75 the GeCKO screens cannot distinguish direct and indirect effects of ISGs on  
76 *Toxoplasma* growth. Additionally, by targeting all protein coding genes in the human  
77 genome, the data analysis in GeCKO screens suffers from a potentially  
78 insurmountable multiple-testing problem. Recently a CRISPR/Cas9-based knockout  
79 library that targets only type I-inducible ISGs in the human genome (1,902 genes in  
80 total) was developed to overcome these limitations and used to systematically  
81 identify key components of IFN $\alpha$ -induced antiviral factors in human cells<sup>24</sup>. The  
82 library relies on the use of lentiviral vectors to deliver CRISPR/Cas9 and single guide  
83 RNAs (sgRNAs) targeting individual ISGs (ISG-knockout library). While this  
84 approach has proven highly successful for identifying ISGs that potently inhibit  
85 viruses, similar screening methodologies have not yet been adapted for parasites.  
86 Here, we performed a loss-of-function screen using the ISG-knockout to rapidly  
87 identify ISGs that control *Toxoplasma* in IFN $\alpha$ -stimulated THP-1 cells. The screen  
88 revealed known and previously unappreciated inhibitors of *Toxoplasma* including  
89 *GBP5*, *MAX* and *SXN5*. Taken together, these findings reveal effector molecules  
90 involved in the complex relationship between *Toxoplasma* and the IFN $\alpha$  response  
91 pathway, and open new avenues for exploring the IFN $\alpha$ -induced cell-autonomous  
92 immune regulation of *Toxoplasma*.

93

## 94 RESULTS AND DISCUSSION

### 95 Fluorescence-based loss-of-function screening approach

96 We employed a loss-of-function screen to identify type I interferon-stimulated genes  
97 (ISGs) that control *Toxoplasma* in human macrophages. First, we optimized the  
98 screening conditions by determining the suitability of a cytometry-based protocol to  
99 quantify infected cells as previously described<sup>25</sup>. To do this, GFP-expressing type I  
100 (RH strain) *Toxoplasma* parasites were added to THP-1 cells at a multiplicity of  
101 infection (MOI) of 1 and allowed to infect the cells for 1 hour before rinsing out  
102 extracellular parasites. Cells were then cultured in fresh cell medium for 2, 12, and  
103 24 hours, providing a temporal evaluation of parasite growth. RH is a type I strain  
104 that is susceptible to IFNs in human cells<sup>26</sup> but compared to other clonal *Toxoplasma*  
105 strains replicates faster, thus making it ideal for identifying ISGs that restrict  
106 *Toxoplasma* growth. As shown in **Figure 1A**, we observed an increase in the  
107 percentage of GFP positive (GFP+) cells over time, indicating that GFP fluorescence  
108 can be used to follow parasite growth dynamics in THP-1 cells.

109

110 Next, we sought to define the concentration at which type I interferons minimally  
111 inhibit *Toxoplasma* in THP-1 cells. To do this, THP-1 cells pre-stimulated for ~16h  
112 with increasing concentrations of universal IFN alpha (uIFN $\alpha$ ), were exposed to  
113 syringe-lysed RH parasites for 1 hour before removing extracellular parasites and  
114 incubating the cells further in fresh media for approximately 24 hours. Flow  
115 cytometry analyses of parasite burden based on GFP fluorescence showed that  
116 uIFN $\alpha$  inhibited *Toxoplasma* in a dose-dependent manner, with 200U/ml being the  
117 concentration of uIFN $\alpha$  that minimally inhibit the parasite (**Figure 1B**). Finally, we  
118 sought to determine if, rather than the overall increase in number of GFP+ cells, we

119 could distinguish THP-1 cells with high and low parasite burden based on GFP  
120 fluorescence intensity. As shown in **Figure 1C**, we were able to distinguish cells in  
121 the top and bottom 10% of GFP fluorescence intensity spectrum, corresponding to  
122 cells with high and low parasite burden, respectively. Finally, because the parasites  
123 constitutively express luciferase, we used luciferase activity readout as a proxy of  
124 parasite burden, to confirm that the GFP-low and high cells, indeed contained low  
125 and high parasite numbers, respectively (**Figure 1D**). Together, these results confirm  
126 the suitability of flow cytometry to rapidly measure parasite burden and the inhibitory  
127 capacity of uIFN $\alpha$  on *Toxoplasma* in THP-1 cells.

128

### 129 **Unbiased ISG screen identifies regulators of *Toxoplasma* infection**

130 Having established the suitability of flow cytometry to distinguish cells with low and  
131 high parasite burden, we next leveraged this approach to identify ISGs that control  
132 *Toxoplasma* growth in THP-1 cells. Although several ISGs can inhibit *Toxoplasma*,  
133 the parasite can also induce the expression of some ISG to promote its survival and  
134 replication in host cells. For example, although interferon regulatory factor 3 (IRF3) is  
135 needed by mammalian cells to inhibit many microbes, especially viruses,  
136 *Toxoplasma* activates IRF3 to induce the transcription of several genes that in turn  
137 promote parasite growth in murine cells<sup>27</sup>. Therefore, we coupled the high  
138 throughput cytometry-based parasite growth assay with a CRISPR/cas9-based ISG  
139 loss-of-function screen to identify ISGs that control *Toxoplasma* in human THP-1  
140 cells. Briefly, THP-1 cells were transduced with lentivirus expressing CRISPR/Cas9,  
141 sgRNA targeting all known type I IFN-inducible ISGs (1,902 genes), 200 non-  
142 targeting sgRNAs (controls), and puromycin resistance marker<sup>24</sup> (Materials and  
143 Methods). Although the loss-of-function library is designated as type I ISG knockout



144 library, it is worth noting that some ISGs are induced by both type I IFN and type II  
145 (IFN $\gamma$ ) due to the overlap in signaling pathways between type I and type II IFNs.  
146 Transduced cells were selected in media supplemented with puromycin for 14 days  
147 then stimulated with 200 U/ml of uIFN $\alpha$ , a concentration that minimally inhibit  
148 *Toxoplasma* in THP-1 cells, for 24 hours. We used the minimal uIFN $\alpha$  concentration  
149 to avoid overriding the effect of uIFN $\alpha$  that would potentially occur at high IFN $\alpha$   
150 concentrations due to feedback via IFN signaling. The cells were then synchronously  
151 infected with GFP-expressing RH parasites for 1 hour before removing extracellular  
152 parasites and incubating the cells for 24 hours in cell culture media supplemented  
153 with dextran sulfate to inhibit late or re-infection by egressed parasites<sup>28</sup>. Next, the  
154 cells were sorted into two populations; top 10% of cells expressing the highest GFP  
155 fluorescence (GFP-high) and bottom 10% of cells expressing low GFP (GFP-Low)  
156 reasoning that these would contain sgRNAs targeting inhibitory and non-inhibitory  
157 ISGs, respectively, in the stimulated THP-1 cells (**Figure 2A**). We quantified sgRNA  
158 abundance within the sorted populations by high throughput sequencing and  
159 detected >95% of sgRNAs in the library, which were relatively uniformly distributed  
160 across replicate samples, indicating a constant sgRNA coverage across the different  
161 experimental steps. Next, we calculated the abundance-based rank difference  
162 between the inhibitory (GFP-High) and non-inhibitory (GFP-Low) fractions to identify  
163 sgRNAs that control *Toxoplasma* in uIFN $\alpha$ -stimulated THP-1 cells. We found that  
164 sgRNAs targeting guanylate binding protein (*GBP*) 5, a known inhibitor of  
165 *Toxoplasma* in THP-1 cells<sup>29</sup>, was enriched in the GFP-high cell population,  
166 indicating that the screen can identify regulators of *Toxoplasma* in human cells. In  
167 total, we found that sgRNAs targeting 26 ISGs, were significantly ( $\log_2FC \geq 1$  and  
168  $FDR < 0.1$ ) enriched in the GFP-high, relative to GFP-low, cell population (**Figure**

169 **2B**). Meanwhile sgRNA targeting *IRF2*, which can potentially function as a  
170 transcriptional inhibitor or activator of the inflammatory IRF1 in different inflammatory  
171 states<sup>30</sup>, was enriched in the GFP-low fraction (**Figure 2B**). *Toxoplasma* can also  
172 dysregulate ISGs in naïve host cells to promote its survival and growth in host  
173 cells<sup>18,31,32</sup>. We reasoned that *Toxoplasma* should be able to replicate robustly in  
174 naïve cells, except in cells lacking a parasite-induced gene required to support  
175 parasite growth. Therefore, to identify *Toxoplasma*-induced ISGs that potentially  
176 promote *Toxoplasma* growth in THP-1 cells, we infected naïve THP-1 cells then  
177 sorted 10% of cells expressing the highest and lowest GFP fluorescence. sgRNAs  
178 targeting 32 ISGs were significantly ( $\log_2FC \geq 1$  and  $FDR < 0.1$ ) enriched in the  
179 GFP-high relative to GFP-low fraction. These included sgRNAs targeting adenosine  
180 monophosphate deaminase (*AMDP3*), 5'-aminolevulinate synthase 1 (*ALAS1*), and  
181 phosphoribosylglycinamide formyltransferase (*GART*) enzymes. At least 5 out of 8  
182 sgRNAs targeting these genes had similar effects, suggesting that the phenotypes  
183 were not due to off target effects.

184

185 To gain further insights into the hits from the screen, we performed a functional  
186 enrichment analysis on the ISGs targeted by the significantly enriched sgRNAs. We  
187 found that ISGs that inhibit *Toxoplasma* in stimulated THP-1 cells were enriched in  
188 molecular pathways associated with protein heteromerization (*Adj p value = 0.009*),  
189 positive regulation of IL1 $\beta$  production (*Adj p value = 0.04*), and SUMOylation of  
190 transcription factors (*Adj p value = 0.03*). Functional enrichment analysis of ISGs  
191 enriched within the GFP-Low fraction in the non-stimulated cells revealed significant  
192 overrepresentation of genes in the purine and heme metabolism pathway,  
193 suggestive of important roles for these pathways in *Toxoplasma* growth in THP-1

194 cells. Taken together, these results demonstrate that the ISG-knockout screen can  
195 be used to rapidly identify ISGs that control *Toxoplasma* growth in human cells.

196

### 197 **Validation of inhibitory factors**

198 To validate some of the ISGs that control *Toxoplasma* in THP-cells, we measured  
199 parasite burden in THP-1 cells expressing sgRNAs targeting each candidate ISG in  
200 a one gene at a time format. *GBP5* is a well-characterized negative regulator of  
201 *Toxoplasma* that is reported to reduce parasites burden in THP-1 cells<sup>33</sup>. Compared  
202 to wildtype cells, ablation of *GBP5*, as previously described<sup>33</sup>, diminished the ability  
203 of uIFN $\alpha$ -stimulated THP-1 cells to inhibit *Toxoplasma* (**Figure 3**). To validate  
204 previously unrecognized regulators of *Toxoplasma* in THP-1 cells from the ISG  
205 screen, we measured parasite burden in uIFN $\alpha$ -stimulated THP-1 cells that express  
206 sgRNA targeting either Small RNA binding exonuclease protection factor La (*SSB*),  
207 MYC associated factor X (*MAX*), Sorting nexin 5 (*SNX5*), or Coagulation factor II  
208 thrombin receptor like 2 (*F2RL2*), which were ranked in the top 10 of ISGs with  
209 significant inhibitory effect on *Toxoplasma* in uIFN $\alpha$ -stimulated THP-1 cells.  
210 Compared to cells transduced with control lentivirus, editing *MAX*, *SNX5*, *F2RL2*,  
211 and *SSB* abolished the inhibitory effect of uIFN $\alpha$  on *Toxoplasma* growth in THP-1  
212 cells (**Figure 3**). *SNX5* binds phosphoinositides such as phosphatidylinositol 3-  
213 phosphate (PtdIns(3)P) and is essential for sensing and driving membrane  
214 curvature<sup>34</sup>. PtdIns(3)P generation by class III phosphatidylinositol 3-kinase  
215 (PI3KC3) complex and membrane remodelling are critical early steps during  
216 autophagosome biogenesis<sup>35</sup>. Since autophagy is known to be a key mechanism by  
217 which human cells control *Toxoplasma* infections<sup>36,37</sup>, it is possible that *SNX5* control  
218 *Toxoplasma* by augmenting autophagy in THP-1 cells. Canonical autophagy involves

219 the formation of double membrane phagophore and the processing and conjugation  
220 of the cytosolic associated protein light chain 3 (LC3) to the  
221 phosphatidylethanolamine (PE)<sup>36</sup>. Therefore, prior to confirming the impact of *SNX5*  
222 on autophagy as a mechanism for regulating *Toxoplasma* in uIFN $\alpha$ -stimulated THP-  
223 1 cells, we will need to directly investigate the localization of LC3 on the PVM in  
224 *SNX5*-deficient cells relative to wild type cells. The recruitment of LC3 to the PVM in  
225 HeLa was shown to be parasite strain-specific, with the type II strain being more  
226 susceptible to LC3 coating than the type I used in this study<sup>36</sup>. Human anti-  
227 *Toxoplasma* cellular mechanisms are known to be cell-type specific, thus, it is  
228 possible that in THP-1 cells, both the type I and II parasite strains are susceptible to  
229 autophagy-mediated restriction. *F2RL2* encodes a member of the protease activated  
230 receptor (PAR) family, PAR3, which are a class of G protein-coupled transmembrane  
231 receptors activated via the proteolytic cleavage of their N-termini and are involved in  
232 a number of inflammatory and infectious diseases<sup>38</sup>. Previous studies have shown  
233 the involvement of PARs in *Toxoplasma*-induced intestinal inflammation in mice.  
234 Mice lacking a functional PAR2 exhibited reduced intestinal inflammation  
235 accompanied by diminished secretion of pro-inflammatory cytokines such as IL6 and  
236 CXCL1<sup>39</sup>. It is possible that the anti-*Toxoplasma* activity of *F2RL2* in THP-1 cells is  
237 mediated via its ability to regulate uIFN $\alpha$ -induced inflammatory signalling. Like other  
238 *Toxoplasma*-restriction factors validated, we do not know whether the effect of *SNX5*  
239 or *F2RL2* on intracellular parasite burden is due to their impact of parasite survival or  
240 replication. We will also need to determine whether any of the identified restriction  
241 factors localize to the PVM or interfere with the localization of other anti-*Toxoplasma*  
242 effectors, such as GBPs, to the PVM.

243

244 **CONCLUDING REMARKS**

245 Type I interferon (IFN) is a multi-gene cytokine family that encodes thirteen partly  
246 homologous IFN $\alpha$  subtypes in humans, one IFN $\beta$ , and several poorly defined single  
247 gene products<sup>4</sup>. This work focused on IFN $\alpha$ , which together with IFN $\beta$ , are well  
248 characterized and broadly expressed. Compared to type II interferons (IFNs), the  
249 role of type I IFNs in human cell-autonomous responses to *Toxoplasma* is not well  
250 established. To address this gap in the knowledge, we adapted a flow cytometry-  
251 based loss-of-function screening approach to identify cellular regulators of  
252 *Toxoplasma* infection among 1902 type I IFN-stimulated genes (ISGs) in THP-1  
253 cells. We elected to use parasite fluorescent intensity as our screening output as it is  
254 high throughput and a broad phenotype governed both by parasite death and growth  
255 inhibition. The screen identified both known (for example Guanylate binding protein  
256 5, *GBP5*) and previously unappreciated cell-autonomous inhibitors of *Toxoplasma*.  
257 The findings were confirmed by knocking out five candidate ISGs in THP-1 cells and  
258 we are continuing to validate and functionally characterize more candidate ISGs.  
259 This report provides a genomic landscape of the regulation of IFN $\alpha$  pathway in THP-  
260 1 cells and its impact on *Toxoplasma*, and potentially other intracellular pathogens.

## 261 **MATERIALS AND METHODS**

### 262 **Parasites and Cell culture**

263 The type I (RH) *Toxoplasma* parasites engineered to express green fluorescent  
264 protein (GFP) and firefly luciferase have previously been described<sup>40</sup>. The parasites  
265 were maintained by serial passage on confluent human foreskin fibroblast (HFF)  
266 monolayer. THP-1 cells (TIB-202), purchased from ATCC, were cultured in Roswell  
267 Park Memorial Institute (RPMI) media (Invitrogen) supplemented with 10% heat-  
268 inactivated foetal bovine serum (FBS) (Invitrogen), 10 mM HEPES buffer, pH 7.5, 2  
269 mM L-glutamine, and 50 µg/ml penicillin (Thermo Fisher Scientific). Cells were  
270 incubated at 37°C in 5% CO<sub>2</sub>.

271

### 272 **Lentivirus production**

273 Lentivirus stocks expressing the Human ISG CRISPR Knockout (ISG-knockout)  
274 library components were produced as previously described<sup>24,41</sup>, with slight  
275 modifications. Briefly, HEK293 T cells (ATCC) were seeded at 18 million cells in  
276 T175 flasks the day before transfection in Dulbecco's Modified Eagle Medium  
277 (DMEM) supplemented with 10% FBS. One hour prior to transfection, media was  
278 removed and replaced with pre-warmed OptiMEM media (Life Technologies). Cells  
279 were transfected with 20µg of ISG-knockout library containing 15416 sgRNAs  
280 (Addgene, Cat # 125753), 10µg and 15µg of second-generation lentiviral packaging  
281 plasmid psPAX2 (Addgene, Cat # 12260) and pMD2.G (Addgene, Cat # 12259),  
282 respectively, using Lipofectamine 3000 and Plus reagent (Life Technologies)  
283 according to the manufacturer's protocol. Six hours after transfection, the OptiMEM  
284 media was replaced with 30 ml DMEM supplemented with 10% FBS. The following  
285 day, the media was replaced with fresh media supplemented with 500x viral boost

286 reagent (Alstem) as per the manufacturer's recommendations. At 48 hours post  
287 transfection, the viral supernatant was collected and centrifuged at 300 g for 10  
288 minutes and passed through a 0.45 µm filter to remove cell debris. The lentiviral  
289 particles were then concentrated by adding virus precipitation solution (Alstem) to  
290 the viral supernatant followed by incubation overnight at 4°C and centrifugation at  
291 1500 g for 30 minutes at 4°C. The lentiviral pellet was resuspended at 100x of  
292 original volume in cold DMEM and stored at -80°C until use.

293

#### 294 **Lentiviral transduction and screening**

295 THP-1 cells were transduced in triplicates using the TransDux MAX transfection  
296 reagent (System Biosciences, LV860A-1) according to the manufacturer's  
297 recommendations. Briefly, 5 million THP-1 cells were seeded in 10cm petri dishes in  
298 RPMI supplemented with TransDux MAX transfection reagent. Lentivirus was then  
299 added to the cells at a 1:250 v/v ratio and incubated for 24h at 37 °C, 5% CO<sub>2</sub>. The  
300 media was then removed, and the cells cultured in RPMI media supplemented with  
301 puromycin for 14 days with frequent passage to select for transduced cells and  
302 generate enough cells for the screening experiments.

303

304 Three million cells from each triplicate were seeded separately in 6 well-plates in  
305 fresh RPMI media and left unstimulated or stimulated with universal interferon alpha  
306 (200U/ml) (R&D systems) for 24 hours. The cells were then left uninfected or  
307 infected with syringe-lysed GFP-expressing RH parasites at a multiplicity of infection  
308 (MOI) of 1, using a temperature shift-based synchronized invasion approach<sup>42</sup>.  
309 Briefly, *Toxoplasma* parasites were syringe-lysed using 25G needles, passed  
310 through 5µM filter to remove HFFs, and centrifuged at 500 x g for 7 minutes. The

311 parasites were then resuspended in fresh RPMI medium, added to the THP-1 cells  
312 at MOI of 1 room temperature, and immediately centrifuged at 250 g for 3 minutes  
313 followed by incubation at room temperature for 5 minutes. The cells were then  
314 transferred into 37 °C, 5% CO<sub>2</sub> incubator. Two hours post-infection, extracellular  
315 parasites were removed with three phosphate buffered saline (PBS) washes before  
316 culturing the cell further in RPMI supplemented with 10% FBS and Dextran sulfate,  
317 to inhibit re-infection or late infections<sup>28</sup>. At 24 hours post infection the cells were  
318 harvested and processed for flow cytometry.

319

### 320 **Flow cytometry**

321 Three million infected or uninfected THP-1 cells were harvested and washed twice  
322 with warm PBS. Cells were resuspended in PBS + 1% bovine serum albumin (BSA).  
323 All samples were analyzed on a LSR Fortessa (BD Biosciences), and recorded data  
324 was processed using FlowJo 10.3 (FlowJo, LLC). To perform the screen, 500,000  
325 representative cells of GFP-Low (bottom 10%), and GFP-High (Top 10%), were  
326 sorted into lysis buffer for genomic DNA extraction. At the same time 500,000 viable  
327 uninfected cells were sorted into lysis buffer using the LIVE/DEAD dye. 500,000  
328 unsorted cells from each population (infected and uninfected) were used as input  
329 controls.

330

### 331 **Preparation of genomic DNA for sequencing**

332 Genomic DNA (gDNA) was isolated separately from the sorted and unsorted cell  
333 fractions using DNeasy Blood and Tissue Kit (Qiagen). Amplification and bar-coding  
334 of sgRNAs was performed as described previously<sup>24,41</sup>. Briefly, each sample was  
335 divided into 10 50µl reactions with 2µg gDNA, 2x High Fidelity PCR Master Mix,



336 10 $\mu$ M of both forward and reverse primer 1. The PCR primers and conditions are  
337 available from Addgene. The PCR product were mixed and cleaned using QIAquick  
338 PCR Purification Kit (Qiagen). Next, 5 $\mu$ l was taken from the cleaned PCR product to  
339 go into a second PCR for indexing. The indexed PCR products were cleaned using 1  
340 Volume AMPure XP beads on magnetic stand and eluted with EB buffer (QIAGEN)  
341 followed by quantification using a Qubit dsDNA HS Assay Kit. The product size was  
342 also confirmed by running 2 $\mu$ l of the PCR product on a 2% agarose gel. Purified  
343 samples were multiplexed and sequenced on a NextSeq 500 machine to generate  
344 ~40 million 75-bp single-end reads per sample (Edinburgh Clinical Research  
345 Facility).

346

#### 347 **Analysis of ISG CRISPR Screens**

348 Sequencing reads were processed and analyzed using the MAGeCK software<sup>43</sup> to  
349 identify negative and positive hits in the screens by quantifying and testing for  
350 sgRNA enrichments as previously described<sup>24,41</sup>. Briefly, sgRNA abundance was first  
351 determined using the MAGeCK 'count' module for the raw sequencing reads using  
352 default settings and removing sgRNAs with less than 50 reads in two out of the three  
353 replicates. The MAGeCK 'test' module, was then used to normalize the samples for  
354 varying sequencing depths and to test for sgRNA and gene-level enrichment. The  
355 non-targeting sgRNAs controls in the ISG-knockout library were used to estimate  
356 size factor for normalization and build the mean variance. The sgRNA-level  
357 enrichment scores from MAGeCK were then used to generate gene-level enrichment  
358 scores by alphaRobust rank aggregation (RRA). Significantly positively or negatively  
359 selected ISGs were selected based on absolute log<sub>2</sub> fold change  $\geq 1$  and Bonferroni-  
360 corrected false discovery rate (FDR)  $< 0.1$ .

361

## 362 **Gene Set Enrichment Analysis for Screen Hits**

363 We used Gene Set Enrichment Analysis (GSEA) in the fgsea package<sup>44</sup> to identify  
364 enriched annotations in the ISGs that were significantly positively or negatively  
365 selected for in the screens using logFC values for all ISGs in tested in the screen.  
366 We used the KEGG pathways dataset as the reference gene annotation database.  
367 Normalized enrichment scores and p-values were determined by a permutation test  
368 with 10,000 iterations with same size randomized gene sets and adjusted with the  
369 FDR method.

370

## 371 **Functional validation candidate genes**

372 The sequences of gRNAs used for CRISPR knockout for *GBP2* and *SNX5* have  
373 previously been described<sup>29,45</sup>. The corresponding top ranked sgRNAs from the  
374 screen were used to individually knockout *MAX*, *SSB*, and *F2RL2*. For generation of  
375 knockout cell lines, sgRNA targeting each gene was individually cloned into the  
376 pLentiCRISPR-V2 backbone<sup>46</sup> and transfected into 293T cells along with packaging  
377 plasmids (psPAX2 and pMD2.G) to generate sgRNA- and Cas9-expressing  
378 lentivirus. THP-1 cells were separately transduced with lentivirus expressing sgRNA  
379 targeting each candidate gene and selected with 5 µg mL<sup>-1</sup> Puromycin (A1113802,  
380 Gibco) for 7 days; all control (non-transduced cells in Puromycin) were dead by this  
381 time. The transduced cells were sub-cloned by serial dilution into 96-well plates  
382 using complete medium supplemented with non-essential amino acids (11140076,  
383 Gibco), penicillin/streptomycin and GlutaMAX. The clones were expanded into 6-well  
384 plates and the frequency of deletions and insertion in the targeted gene confirmed  
385 using deep targeted sequencing, which confirmed the sgRNA-targeted deletion of  
386 each gene in THP-1 cells.

387

388 **AUTHOR CONTRIBUTION**

389 MH conceived the project. AG, AR, and MH designed and conducted the  
390 experiments and wrote the manuscript.

391

392 **FUNDING**

393 MH is supported by the Academy of Medical Sciences Springboard award and a  
394 University of Edinburgh Chancellor's Fellowship. The Roslin Institute also receives  
395 core funding from the Biotechnology and Biological Sciences Research Council.

396 **REFERENCES**

- 397 1. Torgerson, P. R. *et al.* The global burden of foodborne parasitic diseases: An  
398 update. *Trends in Parasitology* vol. 30 20–26 (2014).
- 399 2. Weitberg, A. B., Alper, J. C., Diamond, I. & Fligiel, Z. Acute Granulomatous  
400 Hepatitis in the Course of Acquired Toxoplasmosis. *N. Engl. J. Med.* **300**,  
401 1093–1096 (1979).
- 402 3. Sutherland, A. L. *et al.* Beyond the association. *Toxoplasma gondii* in  
403 schizophrenia, bipolar disorder, and addiction: systematic review and meta-  
404 analysis. *Acta Psychiatr. Scand.* **132**, 161–179 (2015).
- 405 4. Pestka, S., Krause, C. D. & Walter, M. R. Interferons, interferon-like cytokines,  
406 and their receptors. *Immunol. Rev.* **202**, 8–32 (2004).
- 407 5. Plataniias, L. C. Mechanisms of type-I- and type-II-interferon-mediated  
408 signalling. *Nat. Rev. Immunol.* **5**, 375–386 (2005).
- 409 6. Gazzinelli, R. T. *et al.* Parasite-induced IL-12 stimulates early IFN-gamma  
410 synthesis and resistance during acute infection with *Toxoplasma gondii*. *J.*  
411 *Immunol.* **153**, 2533–2543 (1994).
- 412 7. Saeij, J. P. J. & Frickel, E.-M. M. Exposing *Toxoplasma gondii* hiding inside the  
413 vacuole: a role for GBPs, autophagy and host cell death. *Curr Opin Microbiol*  
414 **40**, 72–80 (2017).
- 415 8. Suzuki, Y., Orellana, M. A., Schreiber, R. D. & Remington, J. S. Interferon-  
416 gamma: the major mediator of resistance against *Toxoplasma gondii*. *Science*  
417 (80-. ). **240**, 516–518 (1988).
- 418 9. Gazzinelli, R. T., Mendonca-Neto, R., Lilue, J., Howard, J. & Sher, A. Innate  
419 resistance against *Toxoplasma gondii*: an evolutionary tale of mice, cats, and  
420 men. *Cell Host Microbe* **15**, 132–138 (2014).

- 421 10. Lüder, C. G. K. & Rahman, T. Impact of the host on Toxoplasma stage  
422 differentiation. *Microb. Cell* **4**, 203–211 (2017).
- 423 11. Yamamoto, M. *et al.* A cluster of interferon- $\gamma$ -inducible p65 gtpases plays a  
424 critical role in host defense against toxoplasma gondii. *Immunity* **37**, 302–313  
425 (2012).
- 426 12. Mair, K. H. *et al.* The porcine innate immune system: An update.  
427 *Developmental and Comparative Immunology* (2014)  
428 doi:10.1016/j.dci.2014.03.022.
- 429 13. Cui, J. & Shen, B. Transcriptomic analyses reveal distinct response of porcine  
430 macrophages to Toxoplasma gondii infection. *Parasitol. Res.* **119**, 1819–1828  
431 (2020).
- 432 14. Pfefferkorn, E. R. Interferon gamma blocks the growth of Toxoplasma gondii in  
433 human fibroblasts by inducing the host cells to degrade tryptophan. *Proc. Natl.*  
434 *Acad. Sci. U. S. A.* **81**, 908–912 (1984).
- 435 15. Janssen, R. *et al.* Divergent Role for TNF- $\alpha$  in IFN- $\gamma$ -Induced Killing of  
436 Toxoplasma gondii and Salmonella typhimurium Contributes to Selective  
437 Susceptibility of Patients with Partial IFN- $\gamma$  Receptor 1 Deficiency. *J. Immunol.*  
438 **169**, 3900–3907 (2002).
- 439 16. McNab, F., Mayer-Barber, K., Sher, A., Wack, A. & O'Garra, A. Type I  
440 interferons in infectious disease. *Nat. Rev. Immunol.* **15**, 87–103 (2015).
- 441 17. Han, S. J. *et al.* Internalization and TLR-dependent type i interferon production  
442 by monocytes in response to Toxoplasma gondii. *Immunol. Cell Biol.* **92**, 872–  
443 881 (2014).
- 444 18. Matta, S. K. *et al.* Toxoplasma gondii effector TgIST blocks type I interferon  
445 signaling to promote infection. *Proc. Natl. Acad. Sci. U. S. A.* **116**, 17480–

- 446 17491 (2019).
- 447 19. Nagineni, C. N., Pardhasaradhi, K., Martins, M. C., Detrick, B. & Hooks, J. J.  
448 Mechanisms of interferon-induced inhibition of *Toxoplasma gondii* replication  
449 in human retinal pigment epithelial cells. *Infect. Immun.* **64**, 4188–4196 (1996).
- 450 20. Mahmoud, M. E., Ui, F., Salman, D., Nishimura, M. & Nishikawa, Y.  
451 Mechanisms of interferon-beta-induced inhibition of *Toxoplasma gondii* growth  
452 in murine macrophages and embryonic fibroblasts: Role of immunity-related  
453 GTPase M1. *Cell. Microbiol.* **17**, 1069–1083 (2015).
- 454 21. Balce, D. R. *et al.* UFMylation inhibits the proinflammatory capacity of  
455 interferon- $\gamma$ -activated macrophages. *Proc. Natl. Acad. Sci. U. S. A.* **118**,  
456 e2011763118 (2021).
- 457 22. Kane, M. *et al.* Identification of Interferon-Stimulated Genes with Antiretroviral  
458 Activity. *Cell Host Microbe* **20**, 392–405 (2016).
- 459 23. Kuroda, M. *et al.* Identification of interferon-stimulated genes that attenuate  
460 Ebola virus infection. *Nat. Commun.* **11**, 2953 (2020).
- 461 24. Roesch, F., OhAinle, M. & Emerman, M. A CRISPR screen for factors  
462 regulating SAMHD1 degradation identifies IFITMs as potent inhibitors of  
463 lentiviral particle delivery. *Retrovirology* **15**, 26 (2018).
- 464 25. Pernas, L., Bean, C., Boothroyd, J. C. & Scorrano, L. Mitochondria Restrict  
465 Growth of the Intracellular Parasite *Toxoplasma gondii* by Limiting Its Uptake  
466 of Fatty Acids. *Cell Metab.* **27**, 886-897.e4 (2018).
- 467 26. Niedelman, W., Sprokholt, J. K., Clough, B., Frickel, E. M. & Saeij, J. P. Cell  
468 death of gamma interferon-stimulated human fibroblasts upon *Toxoplasma*  
469 *gondii* infection induces early parasite egress and limits parasite replication.  
470 *Infect Immun* **81**, 4341–4349 (2013).

- 471 27. Majumdar, T. *et al.* Induction of interferon-stimulated genes by IRF3 promotes  
472 replication of *Toxoplasma gondii*. *PLoS Pathog.* **11**, e1004779 (2015).
- 473 28. Carruthers, V. B., Håkansson, S., Giddings, O. K. & Sibley, L. D. *Toxoplasma*  
474 *gondii* uses sulfated proteoglycans for substrate and host cell attachment.  
475 *Infect. Immun.* **68**, 4005–4011 (2000).
- 476 29. Fisch, D., Clough, B., Khan, R., Healy, L. & Fricke, E.-M.  
477 &lt;em&gt;*Toxoplasma*&/em&gt;-proximal and distal control by GBPs in  
478 human macrophages. *bioRxiv* 2021.08.24.457560 (2021)  
479 doi:10.1101/2021.08.24.457560.
- 480 30. Harada, H. *et al.* Structure and regulation of the human interferon regulatory  
481 factor 1 (IRF-1) and IRF-2 genes: implications for a gene network in the  
482 interferon system. *Mol. Cell. Biol.* **14**, 1500–1509 (1994).
- 483 31. Rosowski, E. E. *et al.* Strain-specific activation of the NF-kappaB pathway by  
484 GRA15, a novel *Toxoplasma gondii* dense granule protein. *J. Exp. Med.* **208**,  
485 195–212 (2011).
- 486 32. Jensen, K. D. C. *et al.* *Toxoplasma* Polymorphic Effectors Determine  
487 Macrophage Polarization and Intestinal Inflammation. *Cell Host Microbe* **9**,  
488 472–483 (2011).
- 489 33. Fisch, D., Clough, B., Khan, R., Healy, L. & Fricke, E.-M.  
490 &lt;em&gt;*Toxoplasma*&/em&gt;-proximal and distal control by GBPs in  
491 human macrophages. *bioRxiv* 2021.08.24.457560 (2021)  
492 doi:10.1101/2021.08.24.457560.
- 493 34. Mim, C. & Unger, V. M. Membrane curvature and its generation by BAR  
494 proteins. *Trends Biochem. Sci.* **37**, 526–533 (2012).
- 495 35. Levine, B., Liu, R., Dong, X. & Zhong, Q. Beclin orthologs: integrative hubs of

- 496 cell signaling, membrane trafficking, and physiology. *Trends Cell Biol.* **25**,  
497 533–544 (2015).
- 498 36. Selleck, E. M. *et al.* A Noncanonical Autophagy Pathway Restricts *Toxoplasma*  
499 *gondii* Growth in a Strain-Specific Manner in IFN-gamma-Activated Human  
500 Cells. *MBio* **6**, (2015).
- 501 37. Krishnamurthy, S., Konstantinou, E. K., Young, L. H., Gold, D. A. & Saeij, J. P.  
502 J. The human immune response to *Toxoplasma*: Autophagy versus cell death.  
503 *PLOS Pathog.* **13**, e1006176 (2017).
- 504 38. Heuberger, D. M. & Schuepbach, R. A. Protease-activated receptors (PARs):  
505 mechanisms of action and potential therapeutic modulators in PAR-driven  
506 inflammatory diseases. *Thromb. J.* **17**, 4 (2019).
- 507 39. Bonnart, C. *et al.* Protease-activated receptor 2 contributes to *Toxoplasma*  
508 *gondii*-mediated gut inflammation. *Parasite Immunol.* **39**, e12489 (2017).
- 509 40. Jensen, K. *et al.* *Toxoplasma gondii* rhoptry 16 kinase promotes host  
510 resistance to oral infection and intestinal inflammation only in the context of the  
511 dense granule protein GRA15. *Infect. Immun.* **81**, 2156–2167 (2013).
- 512 41. Shifrut, E. *et al.* Genome-wide CRISPR Screens in Primary Human T Cells  
513 Reveal Key Regulators of Immune Function. *Cell* **175**, 1958–1971 (2018).
- 514 42. Sweeney, K. R., Morrissette, N. S., Lachapelle, S. & Blader, I. J. Host cell  
515 invasion by *Toxoplasma gondii* is temporally regulated by the host microtubule  
516 cytoskeleton. *Eukaryot. Cell* **9**, 1680–1689 (2010).
- 517 43. Li, W. *et al.* MAGeCK enables robust identification of essential genes from  
518 genome-scale CRISPR/Cas9 knockout screens. *Genome Biol* **15**, 554 (2014).
- 519 44. Korotkevich, G. *et al.* Fast gene set enrichment analysis. *bioRxiv* 60012 (2021)  
520 doi:10.1101/060012.



- 521 45. Dong, X. *et al.* Sorting nexin 5 mediates virus-induced autophagy and  
522 immunity. *Nature* **589**, 456–461 (2021).
- 523 46. Shalem, O. *et al.* Genome-scale CRISPR-Cas9 knockout screening in human  
524 cells. *Science* (80-. ). **343**, 84–87 (2014).

525

## 526 **Figure legends**

527 **Figure 1: High throughput parasite growth assay. A)** Representative flow  
528 cytometry plots of universal interferon alpha (uIFN $\alpha$ )-stimulated THP-1 cell  
529 synchronously infected with GFP-expressing Type I (RH) *Toxoplasma* stains at 2,  
530 12, and 24 h post-infection. Values in the upper right corner of each plot indicate the  
531 percentage of GFP-positive cells in singlet cell population. The uninfected control is  
532 presented on the left. **B)** Quantification of parasite burden in THP-1 cells stimulated  
533 with different concentrations of uIFN $\alpha$ . Data are mean  $\pm$  s.d. (n = 3, \*  $p$  = value  $\leq$   
534 0.05, \*\* =  $p$  value  $\leq$ 0.01, ns = not significant relative to control). **C)** THP-1 cells  
535 infected with *Toxoplasma* parasites constitutively expressing GFP and firefly  
536 luciferase for 24h were sorted in flow cytometry into GFP-negative, GFP-low, GFP-  
537 medium, and GFP-high. **D)** Luciferase activity assay, as a proxy of parasite burden,  
538 confirm that GFP-high THP-1 cells contain significantly more parasites than GFP-low  
539 cells. Data are mean  $\pm$  s.d. pooled from three independent experiments (\*\*\*) =  $p$   
540 value  $\leq$ 0.001 relative to control).

541

542 **Figure 2: A CRISPR screen for regulators of IFN $\alpha$ -dependent control of**  
543 ***Toxoplasma*. A)** THP-1 cells transduced with Human Interferon-Stimulated Gene  
544 CRISPR Knockout Library was stimulated with uIFN $\alpha$  (200U/mL) for 24h and  
545 infected with GFP-expressing type I (RH) *Toxoplasma* parasites. 24 h post-infection,

546 the bottom (GFP-low) and top (GFP-high) GFP-expressing cells were separately  
547 collected in a flow cytometer. Genomic DNA was extracted from the sorted cell  
548 fractions, sequenced and sgRNA enrichment in GFP-high relative to GFP-low cell  
549 fractions determined. **B)** Volcano plot of genes enriched in the top 10%, relative to  
550 bottom 10% of GFP-expressing cells. Significantly enriched genes ( $\log_2FC \leq 1$  and  
551  $FDR < 0.1$ ) are shown in red. Depleted genes are shown in blue.

552

553 **Figure 3: Validation of CRISPR screen hits.** Average luciferase activity (a proxy for  
554 parasite burden) in uIFN $\alpha$ -stimulated cells expressing sgRNA targeting the indicated  
555 candidate ISG. Data are mean  $\pm$  s.d pooled from three independent experiments  
556 relative to uIFN $\alpha$ -stimulated cells expressing sgRNA targeting *ACTB* (\* = *p* value  
557  $\leq 0.05$  determined by *Student t* test).

Figure 1

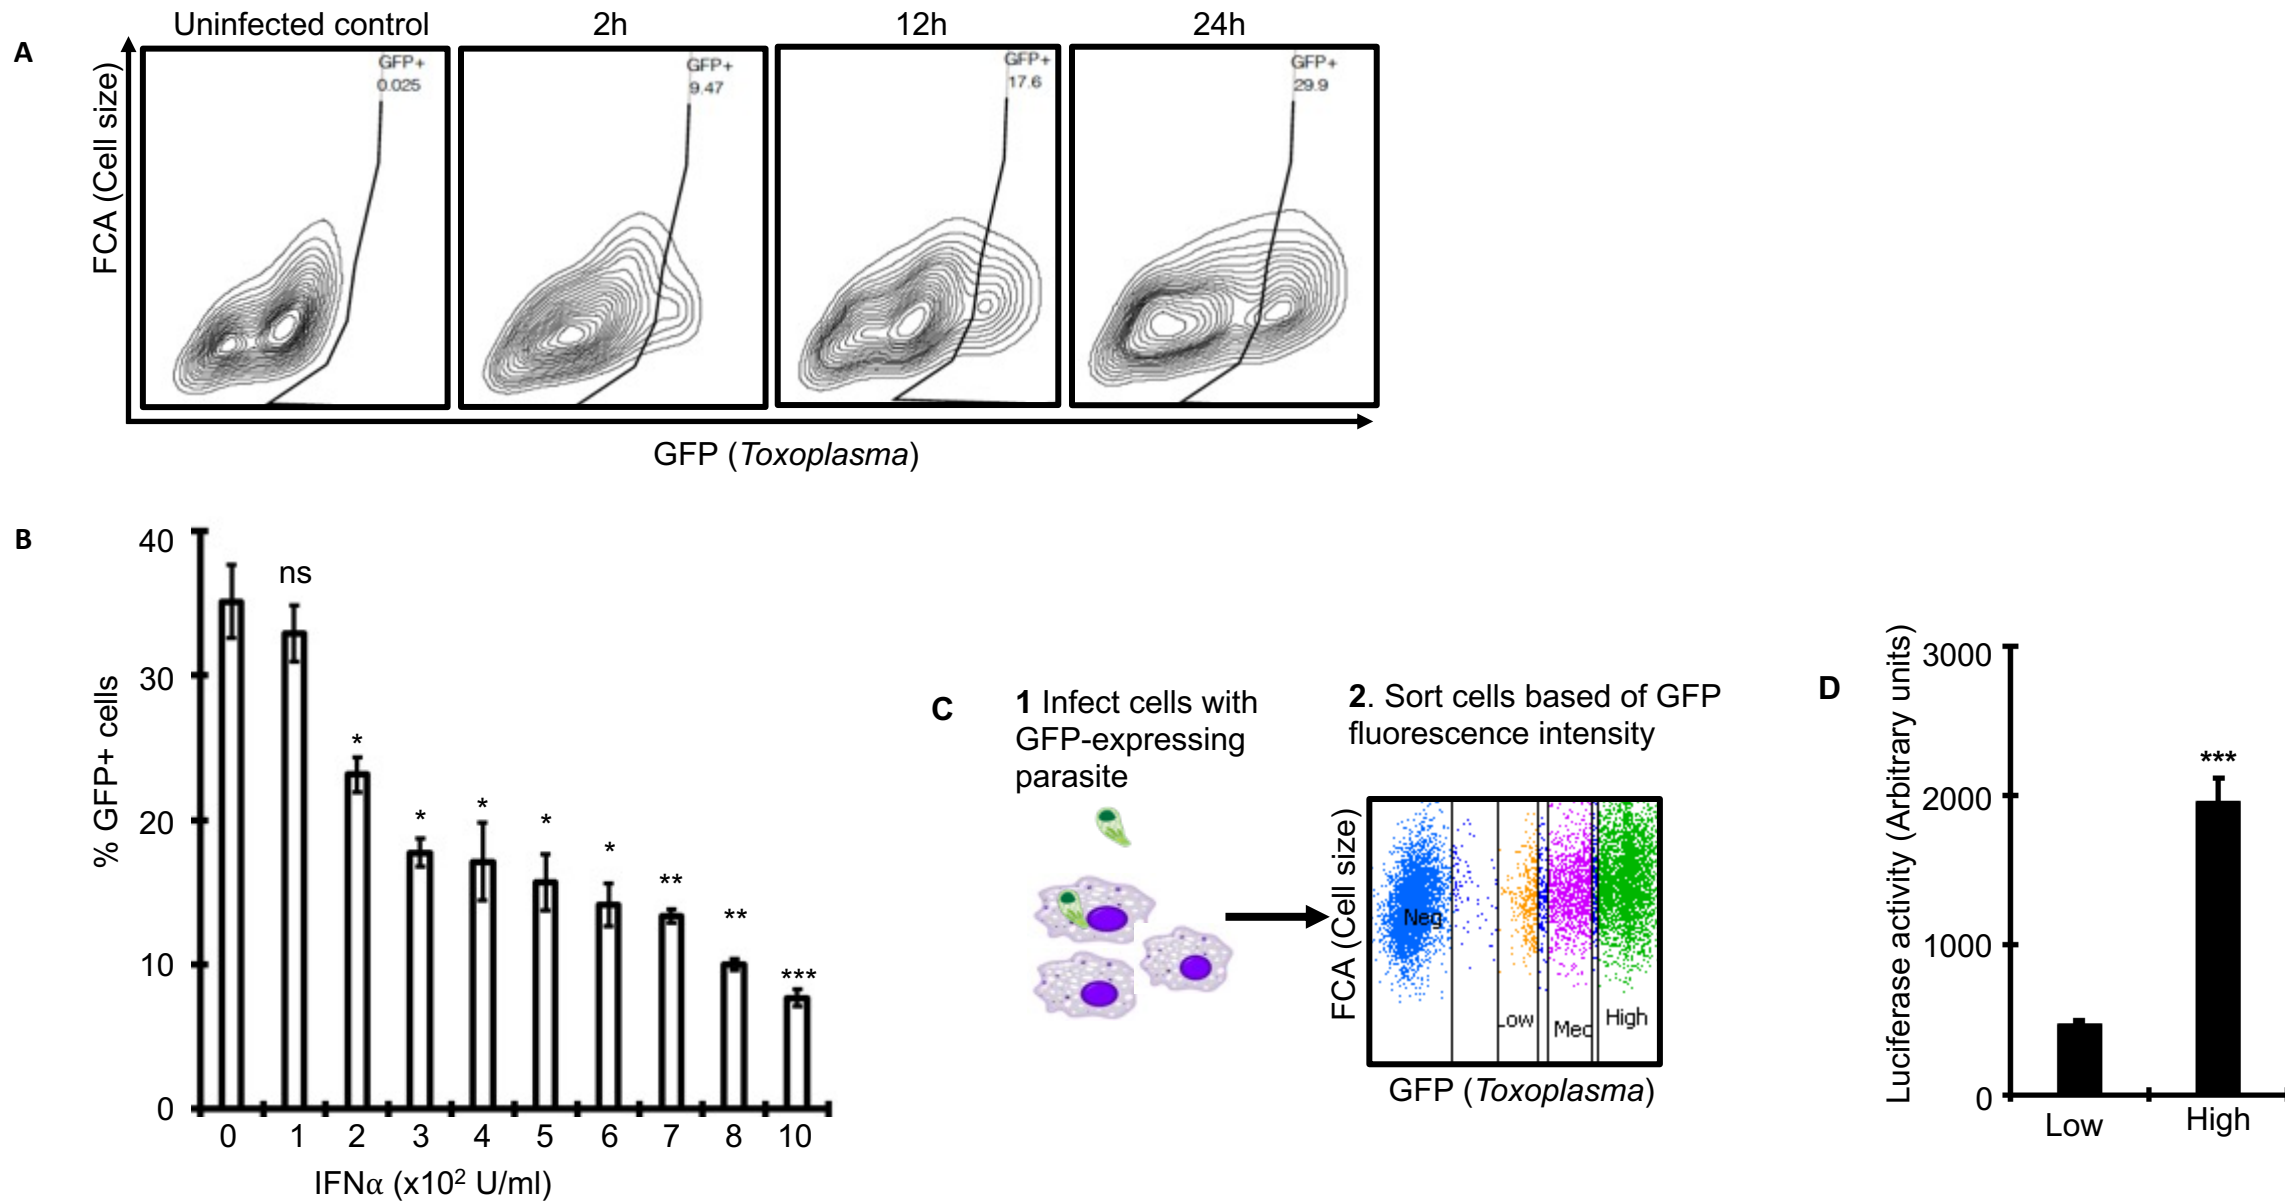

**Figure 2**

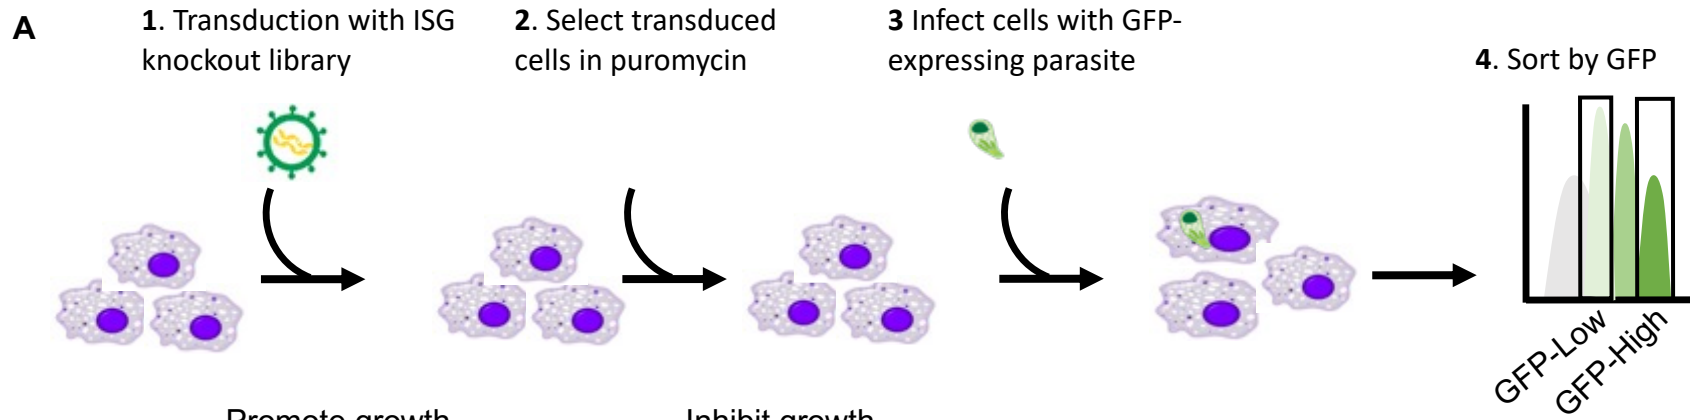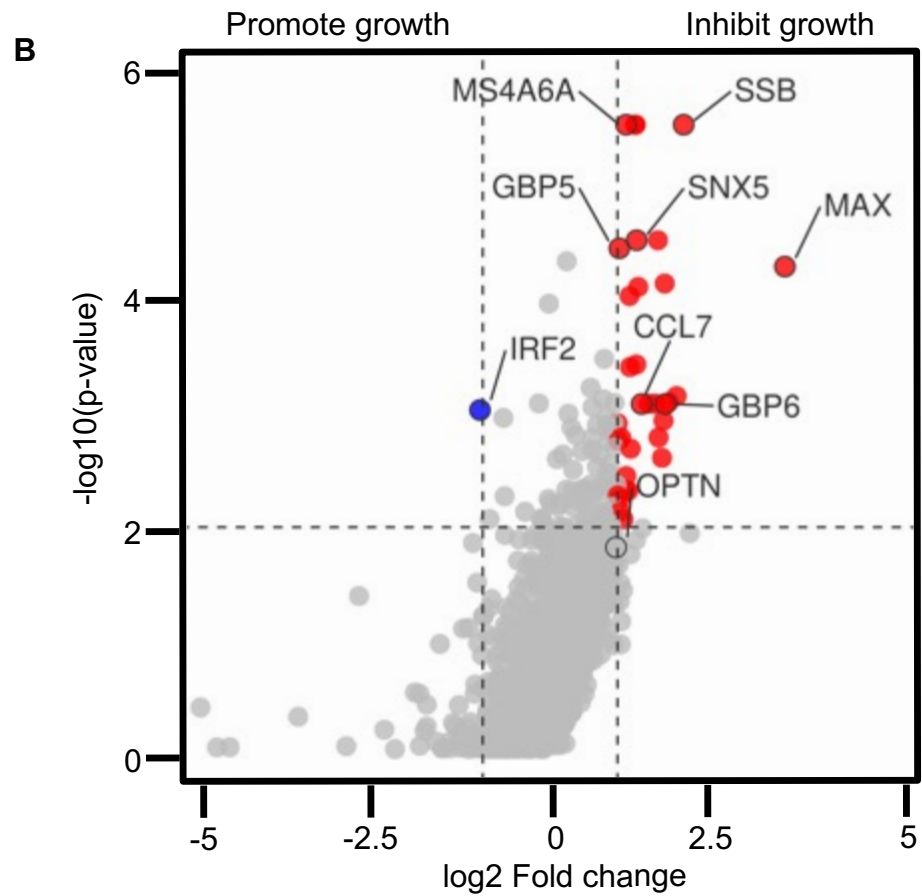

Figure 3

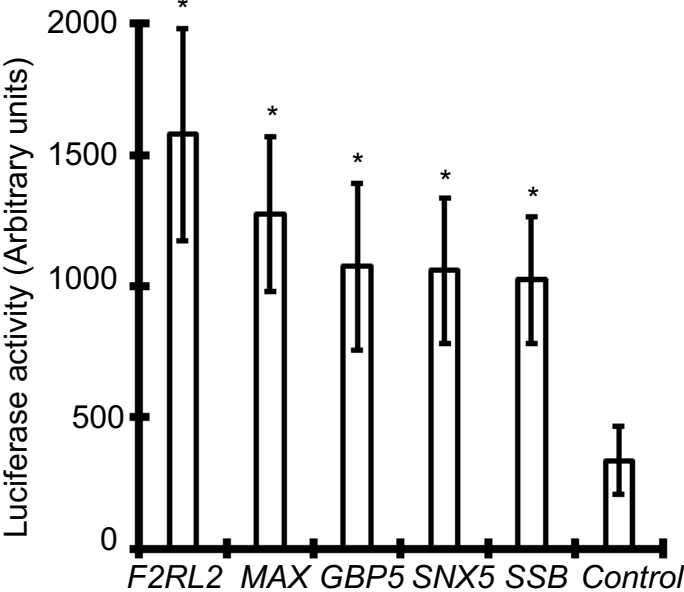

Source: http://biorxiv.org/content/10.1101/2022.01.02.474728v1.full.pdf
